# Supplementary material
Source: ML conference proceedings conference paper supplement (https://openaccess.thecvf.com/content/CVPR2023/html/Yu_DyLiN_Making_Light_CVPR_2023_paper.html)
Supplement: Supplementary file 1 [file Yu_DyLiN_Making_Light_CVPR_2023_supplemental.pdf]

# DyLiN: Making Light Field Networks Dynamic

## Supplementary Material

Heng Yu<sup>1</sup> Joel Julin<sup>1</sup> Zoltán Á. Milacski<sup>1</sup> Koichiro Niinuma<sup>2</sup> László A. Jeni<sup>1</sup>

<sup>1</sup>Robotics Institute, Carnegie Mellon University <sup>2</sup>Fujitsu Research of America

{hengyu, jjulin, zmilacsk}@andrew.cmu.edu kniinuma@fujitsu.com laszlojeni@cmu.edu

### 1. Overview

In this supplementary material, we provide detailed quantitative and additional qualitative results, showcasing the benefits of our proposed DyLiN and CoDyLiN methods. Furthermore, we also provide the training times one should expect given our current setup.

### 2. Per-Scene Quantitative Results

For the sake of completeness, we provide the detailed per-scene quantitative results for reconstruction quality (PSNR, SSIM, MS-SSIM, LPIPS) on the synthetic (Tab. 5) and real (Tab. 6) dynamic scenes, extending Tab. 1 and Tab. 2 in the main paper that average these numbers across the scenes. Accordingly, we found that our DyLiN performs the best with respect to the SSIM and LPIPS metrics, generating perceptually better images, yet it sometimes falls behind in terms of PSNR and MS-SSIM that may prefer blurred results. Knowledge distillation improves a lot, our deformation and hyperspace MLPs yield slightly better results, while fine-tuning on the original training data gives a considerable boost.

### 3. More Qualitative Results

We provide additional qualitative results for 3 experiments.

First, Fig. 9 depicts more qualitative results for reconstruction quality on synthetic dynamic scenes, extending Fig. 6 in the main paper. Specifically, the Standup scene includes buttons on the shirt of the avatar (Fig. 9a), and the baselines are all missing them (Figs. 9b and 9c), whereas our full method is capable of reconstructing such details (Fig. 9e). Furthermore, the Bouncing Ball scene involves shadow casting (Fig. 9f). Inside the shadowed area, D-NeRF [29] produces horizontal artifacts (Fig. 9g), while TiNeuVox [8] predicts an inaccurate boundary (Fig. 9h). Again, our full model outputs the correct shadow (Fig. 9j).

Second, Fig. 10 shows qualitative results for ablation on the synthetic Standup scene using a D-NeRF teacher model,

complementing Fig. 8 in the main paper that is restricted to real scenes and distilling from HyperNeRF [28]. D-NeRF gives an oversmoothed prediction (Fig. 10b), whereas the two MLPs of our DyLiN gradually reduce the blurriness of the face (Figs. 10c to 10e).

Lastly, Fig. 11 illustrates qualitative results for the real controllable Transformer scene, complementing the numbers of Tab. 4 in the main paper. We portray the effects of altering the attribute input  $\alpha_i \in [-1, 1]$ , which encodes the body pose of the character. We found that the CoNeRF [13] teacher model produces yellow color artifacts outside the boundary of the character (see, e.g., top row 1<sup>st</sup> inset), whereas our CoDyLiN student model captures the boundary well.

### 4. Training Times

On a single NVIDIA A100 GPU, the full process takes  $\approx 38$ –43 h, including 5–10 h to train the teacher, 13 h for drawing  $S = 10,000$  training samples for KD, and 20 h for training the student via KD.

Table 5. Per-scene quantitative results on synthetic dynamic scenes. Notations: Multi-Layer Perceptron (MLP), PD (pointwise deformation), FT (fine-tuning). We utilized D-NeRF as the teacher model for our DyLiNs. The winning numbers are highlighted in bold.

| Method                             | Hell Warrior |               |               | Mutant       |               |               | Hook         |               |               | Bouncing Balls |               |               |
|------------------------------------|--------------|---------------|---------------|--------------|---------------|---------------|--------------|---------------|---------------|----------------|---------------|---------------|
|                                    | PSNR↑        | SSIM↑         | LPIPS↓        | PSNR↑        | SSIM↑         | LPIPS↓        | PSNR↑        | SSIM↑         | LPIPS↓        | PSNR↑          | SSIM↑         | LPIPS↓        |
| NeRF [23]                          | 13.52        | 0.8100        | 0.2500        | 20.31        | 0.9100        | 0.0900        | 16.65        | 0.8400        | 0.1900        | 20.26          | 0.9100        | 0.2000        |
| DirectVoxGo [33]                   | 13.51        | 0.7500        | 0.2500        | 19.45        | 0.8900        | 0.1200        | 16.16        | 0.8000        | 0.2100        | 20.20          | 0.8700        | 0.2200        |
| Plenoxels [9]                      | 15.19        | 0.7800        | 0.2700        | 21.44        | 0.9100        | 0.0900        | 17.90        | 0.8100        | 0.2100        | 21.30          | 0.8900        | 0.1800        |
| T-NeRF [29]                        | 23.19        | 0.9300        | 0.0800        | 30.56        | 0.9600        | 0.0400        | 27.21        | 0.9400        | 0.0600        | 37.81          | 0.9800        | 0.1200        |
| D-NeRF [29]                        | 25.10        | 0.9500        | 0.0600        | 31.29        | 0.9700        | 0.0200        | 29.25        | 0.9600        | 0.1100        | 38.93          | 0.9800        | 0.1000        |
| TiNeuVox-S [8]                     | 27.00        | 0.9500        | 0.0900        | 31.09        | 0.9600        | 0.0500        | 29.30        | 0.9500        | 0.0700        | 39.05          | 0.9900        | 0.0600        |
| TiNeuVox-B [8]                     | <b>28.17</b> | 0.9700        | 0.0700        | 33.61        | 0.9800        | 0.0300        | <b>31.45</b> | 0.9700        | 0.0500        | 40.73          | 0.9900        | 0.0400        |
| DyLiN, w/o two MLPs, w/o FT (ours) | 26.81        | 0.9885        | 0.0363        | 32.13        | 0.9961        | 0.0186        | 29.89        | 0.9922        | 0.0297        | 39.78          | 0.9997        | 0.0099        |
| DyLiN, w/o two MLPs (ours)         | 27.73        | 0.9893        | 0.0317        | 33.26        | 0.9971        | 0.0101        | 30.20        | 0.9928        | 0.0187        | 41.13          | <b>0.9998</b> | 0.0064        |
| DyLiN, PD MLP only, w/o FT (ours)  | 26.82        | 0.9886        | 0.0362        | 32.13        | 0.9963        | 0.0185        | 29.94        | 0.9923        | 0.0296        | 39.70          | 0.9996        | 0.0096        |
| DyLiN, PD MLP only (ours)          | 27.75        | 0.9896        | 0.0302        | 33.47        | 0.9972        | 0.0102        | 30.39        | 0.9930        | <b>0.0186</b> | 41.52          | <b>0.9998</b> | <b>0.0062</b> |
| DyLiN, w/o FT (ours)               | 26.90        | 0.9887        | 0.0360        | 32.17        | 0.9963        | 0.0182        | 29.99        | 0.9923        | 0.0289        | 40.02          | 0.9997        | 0.0098        |
| DyLiN (ours)                       | 27.79        | <b>0.9898</b> | <b>0.0298</b> | <b>33.80</b> | <b>0.9974</b> | <b>0.0086</b> | 30.49        | <b>0.9931</b> | <b>0.0186</b> | <b>41.59</b>   | <b>0.9998</b> | <b>0.0062</b> |
| Method                             | Lego         |               |               | T-Rex        |               |               | Stand Up     |               |               | Jumping Jacks  |               |               |
|                                    | PSNR↑        | SSIM↑         | LPIPS↓        | PSNR↑        | SSIM↑         | LPIPS↓        | PSNR↑        | SSIM↑         | LPIPS↓        | PSNR↑          | SSIM↑         | LPIPS↓        |
| NeRF [23]                          | 20.30        | 0.7900        | 0.2300        | 24.29        | 0.9300        | 0.1300        | 18.19        | 0.8900        | 0.1400        | 18.28          | 0.8800        | 0.2300        |
| DirectVoxGo [33]                   | 21.13        | 0.9000        | 0.1000        | 23.27        | 0.9200        | 0.0900        | 17.58        | 0.8600        | 0.1600        | 17.80          | 0.8400        | 0.2000        |
| Plenoxels [9]                      | 21.97        | 0.9000        | 0.1100        | 25.18        | 0.9300        | 0.0800        | 18.76        | 0.8700        | 0.1500        | 20.18          | 0.8600        | 0.1900        |
| T-NeRF [29]                        | 23.82        | 0.9000        | 0.1500        | 30.19        | 0.9600        | 0.1300        | 31.24        | 0.9700        | 0.0200        | 32.01          | 0.9700        | 0.0300        |
| D-NeRF [29]                        | 21.64        | 0.8300        | 0.1600        | 31.75        | 0.9700        | 0.0300        | 32.79        | 0.9800        | 0.0200        | 32.80          | 0.9800        | 0.0300        |
| TiNeuVox-S [8]                     | 24.35        | 0.8800        | 0.1300        | 29.95        | 0.9600        | 0.0600        | 32.89        | 0.9800        | 0.0300        | 32.33          | 0.9700        | 0.0400        |
| TiNeuVox-B [8]                     | <b>25.02</b> | 0.9200        | 0.0700        | 32.70        | 0.9800        | 0.0300        | 35.43        | 0.9900        | 0.0200        | <b>34.23</b>   | 0.9800        | 0.0300        |
| DyLiN, w/o two MLPs, w/o FT (ours) | 22.11        | 0.9747        | 0.0612        | 31.35        | 0.9978        | 0.0290        | 33.98        | 0.9973        | 0.0140        | 33.24          | 0.9981        | 0.0260        |
| DyLiN, w/o two MLPs (ours)         | 22.42        | 0.9761        | 0.0493        | 32.80        | 0.9984        | 0.0170        | 35.31        | 0.9980        | 0.0084        | 33.67          | 0.9984        | 0.0155        |
| DyLiN, PD MLP only, w/o FT (ours)  | 22.13        | 0.9748        | 0.0618        | 32.18        | 0.9982        | 0.0282        | 33.97        | 0.9973        | 0.0140        | 33.19          | 0.9982        | 0.0257        |
| DyLiN, PD MLP only (ours)          | 22.76        | 0.9775        | 0.0452        | 32.77        | <b>0.9985</b> | 0.0176        | 35.56        | 0.9981        | 0.0082        | 33.68          | 0.9984        | 0.0152        |
| DyLiN, w/o FT (ours)               | 22.24        | 0.9754        | 0.0600        | 32.24        | 0.9982        | 0.0276        | 34.15        | 0.9974        | 0.0141        | 33.23          | 0.9983        | 0.0256        |
| DyLiN (ours)                       | 23.10        | <b>0.9791</b> | <b>0.0443</b> | <b>32.91</b> | <b>0.9985</b> | <b>0.0168</b> | <b>35.95</b> | <b>0.9983</b> | <b>0.0074</b> | 33.84          | <b>0.9985</b> | <b>0.0151</b> |

Table 6. Per-scene quantitative results on real dynamic scenes. Notations: Multi-Layer Perceptron (MLP), PD (pointwise deformation), FT (fine-tuning), N/A (not available in the cited research paper). We utilized HyperNeRF as the teacher model for our DyLiNs. The winning numbers are highlighted in bold.

| Method                             | Broom           |                    | 3D Printer      |                    | Chicken         |                    |
|------------------------------------|-----------------|--------------------|-----------------|--------------------|-----------------|--------------------|
|                                    | PSNR $\uparrow$ | MS-SSIM $\uparrow$ | PSNR $\uparrow$ | MS-SSIM $\uparrow$ | PSNR $\uparrow$ | MS-SSIM $\uparrow$ |
| NeRF [23]                          | 19.90           | 0.653              | 20.70           | 0.780              | 19.90           | 0.777              |
| NV [19]                            | 17.70           | 0.623              | 16.20           | 0.665              | 17.60           | 0.615              |
| NSFF [16]                          | <b>26.10</b>    | <b>0.871</b>       | <b>27.70</b>    | <b>0.947</b>       | 26.90           | 0.944              |
| Nerfies [27]                       | 19.20           | 0.567              | 20.60           | 0.830              | 26.70           | 0.943              |
| HyperNeRF [28]                     | 19.30           | 0.591              | 20.00           | 0.821              | 26.90           | 0.948              |
| TiNeuVox-S [8]                     | 21.90           | 0.707              | 22.70           | 0.836              | 27.00           | 0.929              |
| TiNeuVox-B [8]                     | 21.50           | 0.686              | 22.80           | 0.841              | <b>28.30</b>    | 0.947              |
| DyLiN, w/o two MLPs, w/o FT (ours) | 21.98           | 0.808              | 22.99           | 0.899              | 26.89           | 0.948              |
| DyLiN, w/o two MLPs (ours)         | 22.04           | 0.811              | 23.16           | 0.905              | 27.35           | 0.954              |
| DyLiN, PD MLP only, w/o FT (ours)  | 22.02           | 0.805              | 23.04           | 0.903              | 26.88           | 0.948              |
| DyLiN, PD MLP only (ours)          | 22.14           | 0.815              | 23.19           | 0.906              | 27.53           | 0.955              |
| DyLiN, w/o FT (ours)               | 22.04           | 0.809              | 23.06           | 0.902              | 26.91           | 0.948              |
| DyLiN (ours)                       | 22.14           | 0.823              | 23.21           | 0.906              | 27.62           | <b>0.956</b>       |
| Method                             | Peel Banana     |                    | Americano       |                    | Expressions     |                    |
|                                    | PSNR $\uparrow$ | MS-SSIM $\uparrow$ | PSNR $\uparrow$ | MS-SSIM $\uparrow$ | PSNR $\uparrow$ | MS-SSIM $\uparrow$ |
| NeRF [23]                          | 20.00           | 0.769              | N/A             | N/A                | N/A             | N/A                |
| NV [19]                            | 15.90           | 0.380              | N/A             | N/A                | N/A             | N/A                |
| NSFF [16]                          | 24.60           | 0.902              | N/A             | N/A                | N/A             | N/A                |
| Nerfies [27]                       | 22.40           | 0.872              | N/A             | N/A                | N/A             | N/A                |
| HyperNeRF [28]                     | 23.30           | 0.896              | 18.42           | 0.720              | 25.40           | 0.958              |
| TiNeuVox-S [8]                     | 22.10           | 0.780              | N/A             | N/A                | N/A             | N/A                |
| TiNeuVox-B [8]                     | 24.40           | 0.873              | N/A             | N/A                | N/A             | N/A                |
| DyLiN, w/o two MLPs, w/o FT (ours) | 23.38           | 0.872              | 18.45           | 0.722              | 25.36           | 0.950              |
| DyLiN, w/o two MLPs (ours)         | 24.35           | 0.906              | 30.85           | 0.977              | 26.33           | 0.967              |
| DyLiN, PD MLP only, w/o FT (ours)  | 23.70           | 0.882              | 18.47           | 0.722              | 25.55           | 0.960              |
| DyLiN, PD MLP only (ours)          | 25.72           | 0.936              | 31.01           | 0.978              | 26.33           | 0.967              |
| DyLiN, w/o FT (ours)               | 23.97           | 0.886              | 18.48           | 0.722              | 26.51           | 0.969              |
| DyLiN (ours)                       | <b>27.36</b>    | <b>0.952</b>       | <b>31.56</b>    | <b>0.982</b>       | <b>26.91</b>    | <b>0.974</b>       |

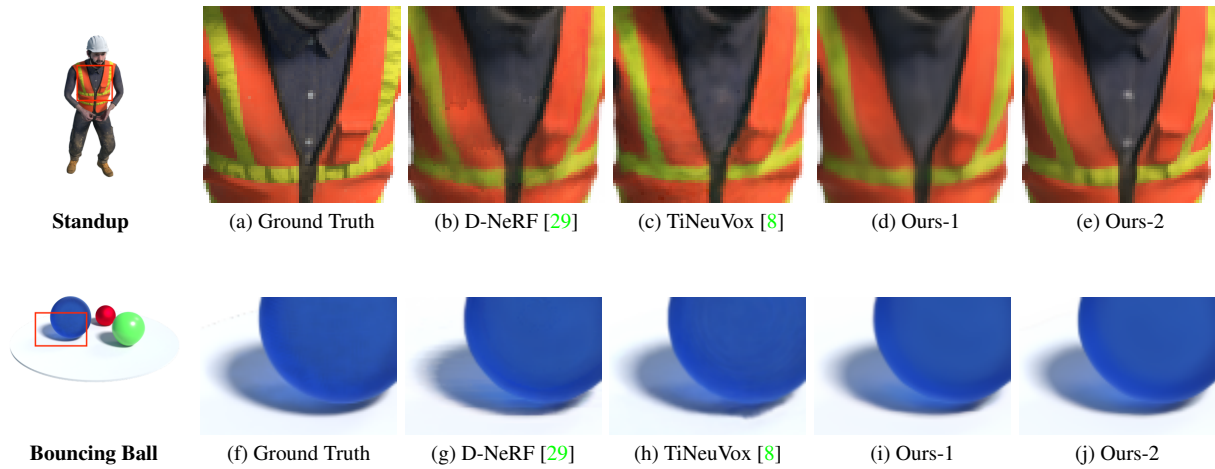

Figure 9. More qualitative results on synthetic dynamic scenes. We compare our DyLiN (Ours-1, Ours-2) with the ground truth, the D-NeRF teacher model and TiNeuVox. Ours-1 and Ours-2 were trained without and with fine-tuning on the original data, respectively.

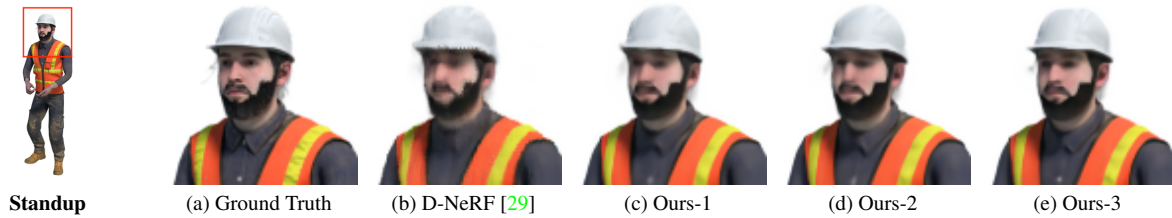

Figure 10. Qualitative results for ablation on the synthetic Standup scene. We compare our DyLiN (Ours-1, Ours-2, Ours-3) with the ground truth and the D-NeRF teacher model. Ours-1 was trained without our two MLPs. Ours-2 was trained with pointwise deformation MLP only. Ours-3 is our full model with both of our proposed two MLPs.

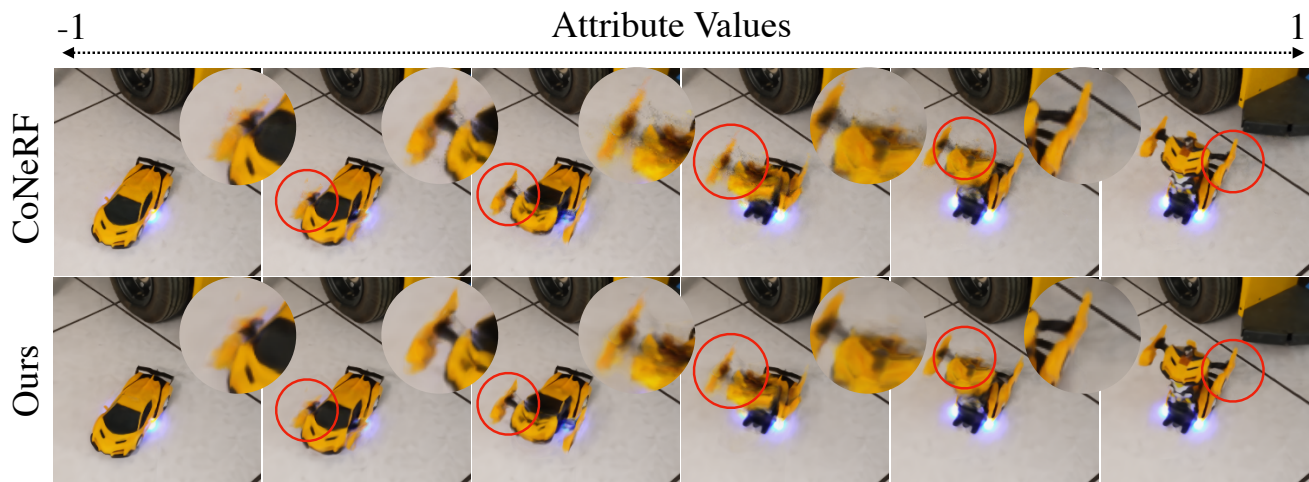

Figure 11. Qualitative results on the real controllable Transformer scene. We utilized CoNeRF [13] as the teacher model for our CoDyLiN. Red circles indicate regions enlarged in insets. Best viewed zoomed in.
